# Supplementary material
Source: publisher site journal article supplement (https://www.dovepress.com/article/349840)
Supplement: Supplementary file 1 [file get_supplementary_file.php]

**Supplementary materials**

In this section we include four reconstructions to obtain the total volume of the brain in 3D motion of an experimental subject for thermonociceptive stimulation, [video 1](http://youtu.be/3jrqNOvBBt4); for denervation T = 0, [video 2](http://youtu.be/EZnKkjAFkQU); for T = 30 post-denervation, [video 3](http://youtu.be/pM4RlV5Smug) and for T = 75 post-denervation, [video 4](http://youtu.be/64HzuyirRCw). The BOLD activation was predominantly present in the right hemisphere of the subjects, contralateral to the left hind limb which received the noxious stimuli. In particular, the ACC showed bilateral activation; see the reconstruction in [video 1](http://youtu.be/3jrqNOvBBt4).
